# Supplementary material for: MoSSe nanotube: a promising photocatalyst with an extremely long carrier lifetime
Source: Royal Society of Chemistry journal article supplement (doi:10.1039/c9ta00244h), 2019-01-01
Supplement: c9ta00244h1.pdf [file c9ta00244h1.pdf]

## Supporting Information

### **MoSSe nanotube: A promising photocatalyst with extremely long carrier lifetime**

Shuai Zhang,<sup>†</sup> Hao Jin,<sup>\* ‡</sup> Chen Long,<sup>†</sup> Tao Wang,<sup>‡</sup> Rui Peng,<sup>†</sup> Baibiao Huang,<sup>†</sup> and Ying Dai<sup>\*†</sup>

<sup>†</sup>School of Physics, State Key Laboratory of Crystal Materials, Shandong University, 250100 Jinan, P. R. China.

<sup>‡</sup>Shenzhen Key Laboratory of Advanced Thin Films and Applications, College of Physics and Optoelectronic Engineering, Shenzhen University, 518060 Shenzhen, P. R. China.

E-mail: [jh@szu.edu.cn](mailto:jh@szu.edu.cn) (H. J), [daiy60@sdu.edu.cn](mailto:daiy60@sdu.edu.cn) (Y. D)

**Table S1.** Detailed informations of Janus MoSSe monolayer and nanotube.

| Structure | Mo-S (Å)  | Mo-Se (Å) | S-Se (Å) | Band gap (eV) | Carrier lifetime (ns) |
|-----------|-----------|-----------|----------|---------------|-----------------------|
| Monolayer | 2.42      | 2.53      | 3.23     | 1.58          | 0.44 <sup>1</sup>     |
| Nanotube  | 2.38/2.40 | 2.56/2.58 | 3.21     | 1.48          | 33                    |

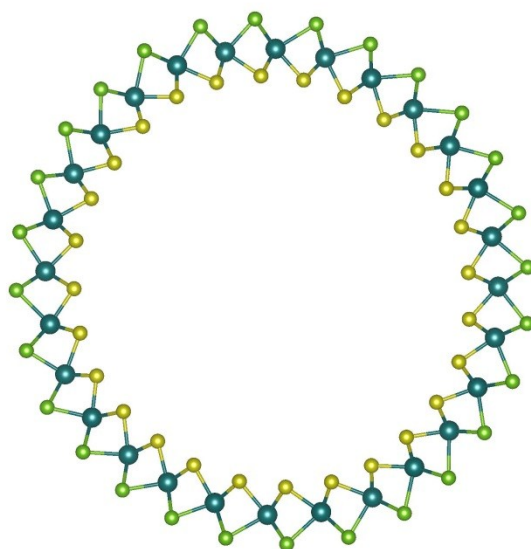

**Figure S1.** Snapshots of the equilibrium structure of Janus MoSSe nanotube at 300 K.

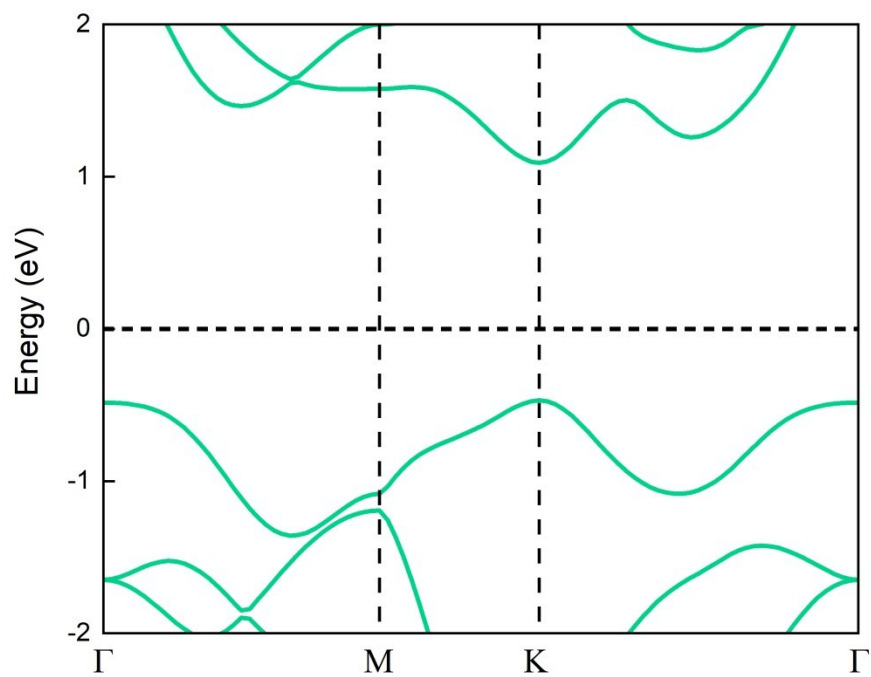

**Figure S2.** Band structure of MoSSe monolayer.

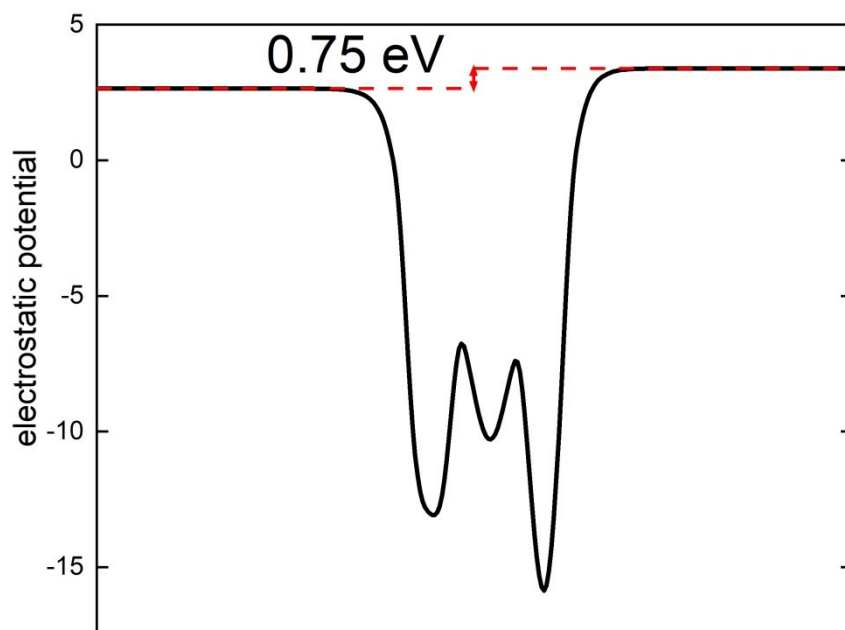

**Figure S3.** Electrostatic potential of monolayer MoSSe.

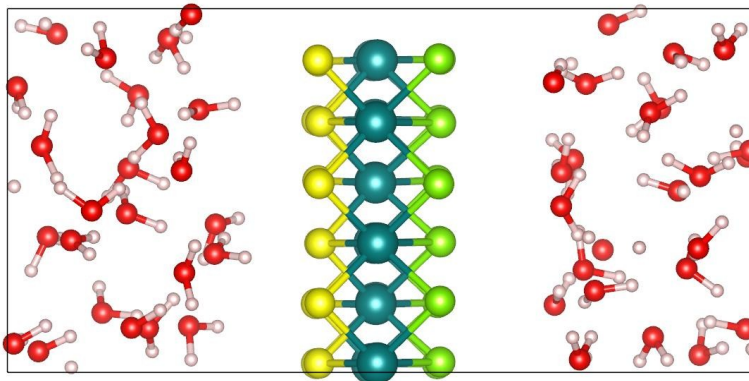

**Figure S4.** Structure of water/MoSSe monolayer.

A system including 48 H<sub>2</sub>O molecules and 12 MoS<sub>2</sub>Se units is constructed to simulate the water/photocatalyst model. Here we perform a MD computation for 3ps at 300K and take final snapshots of the atomic configurations for the following DFT calculations. The geometric structure is shown in Figure S4. The same simulations for MoS<sub>2</sub> and MoSe<sub>2</sub> are also performed for comparison. In Figure S5(a), the red and blue lines represent the projected DOS of water on the S surface and Se surface, respectively.

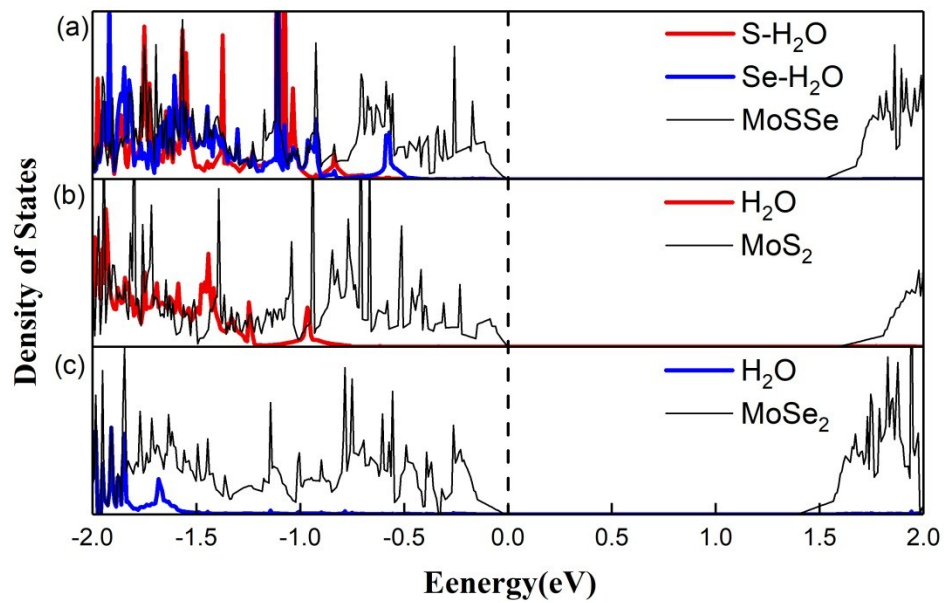

**Figure S5.** PDOS of (a) water/MoSSe, (b) water/MoS<sub>2</sub> and (c) water/MoSe<sub>2</sub>. The dash line represents the Fermi level.

## Reference

- 1 H. Jin, T. Wang, Z.-R. Gong, C. Long and Y. Dai, *Nanoscale*, 2018, **10**, 19310–19315.
